# Supplementary material
Source: publisher figshare collection journal article supplement (https://springernature.figshare.com/ndownloader/files/24100564)

Supplementary Figure 1

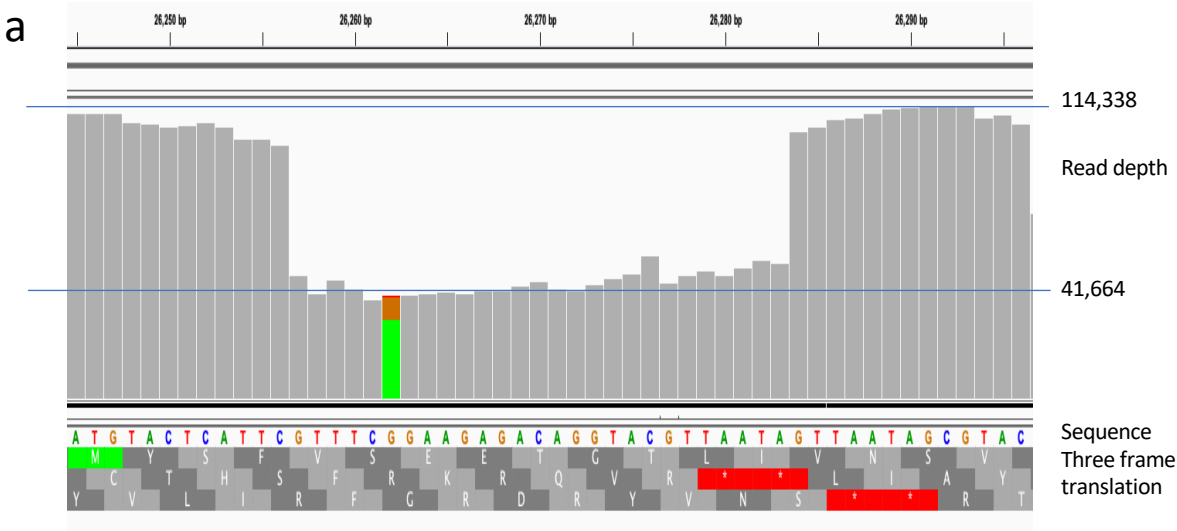

IGV viewer illustration of 27 nt deletion in the viral transcripts covering the beginning of the region coding for envelope E protein from Kim et al.<sup>9</sup> The initiating methionine is seen in the top row of the three frame translation.

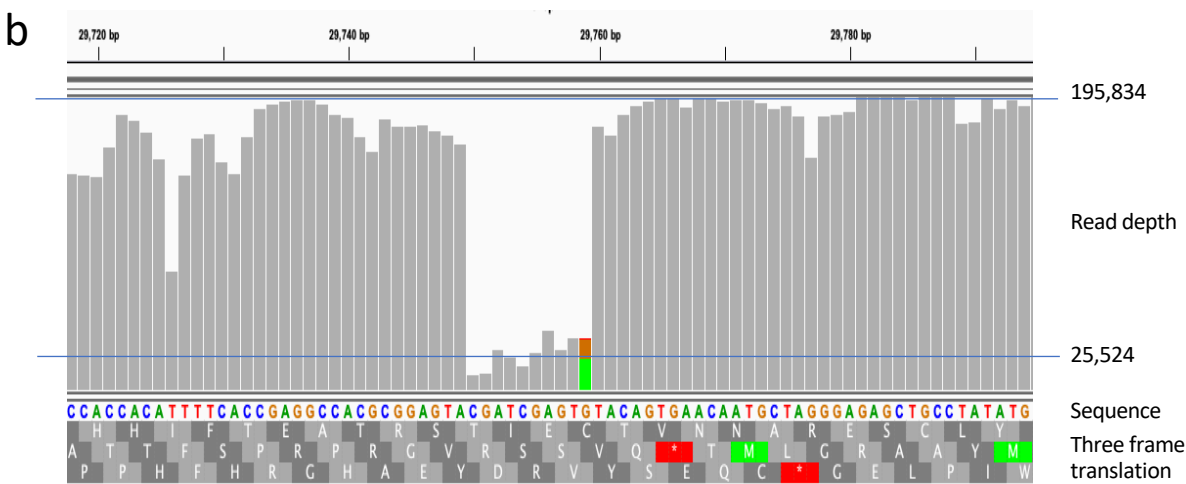

IGV viewer illustration of 10 nt deletion in the viral transcripts from the Tairaros et al.<sup>10</sup> dataset named “covid\_update.fastq” mapped to the wuhan-Hu-1 genome. There are no ORFs affected by this deletion as there are stop codons in all three frames upstream of this deletion.

Supplementary Figure 2

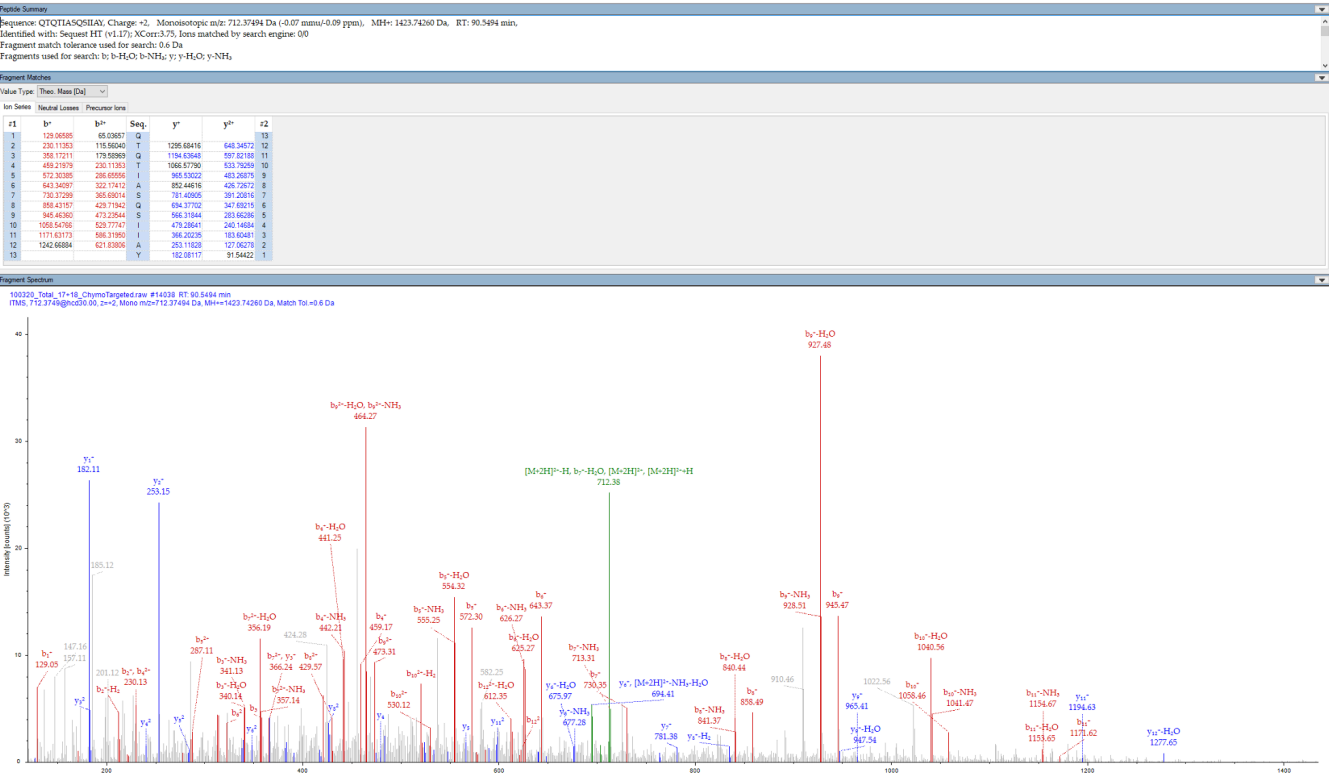

Supplement: Supplementary file [file 24100564]
